# Supplementary figures and images for: Polyinosinic polycytidylic acid (poly I:C) Induces Neuronal Cell Death Through NLRP3-mediated inflammasome in human microglia and neuroinflammation-induced cognitive impairment in mice
Source: Research Square preprint supplement (doi:10.21203/rs.3.rs-7272392/v1), 2025-08-26

**
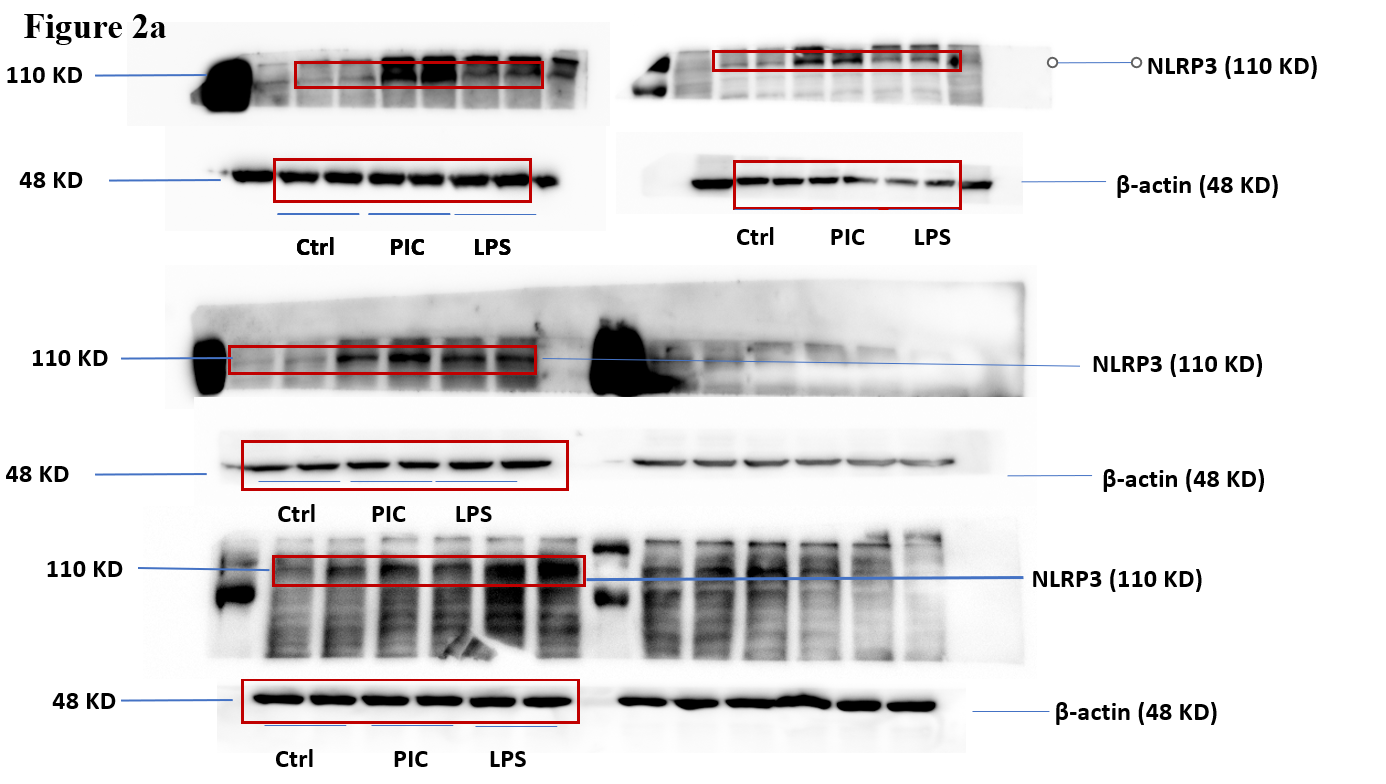
**Supplementary materials


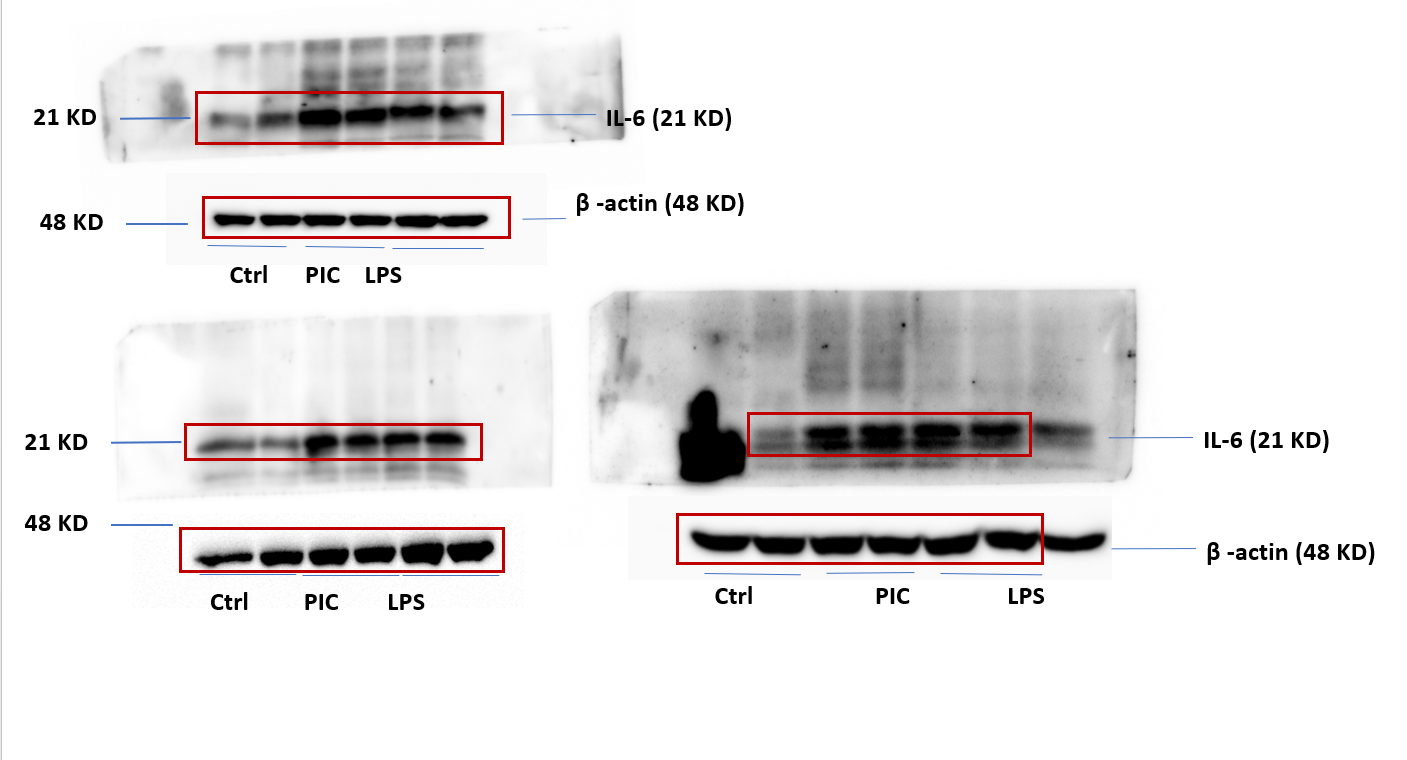


**Figure 2a**


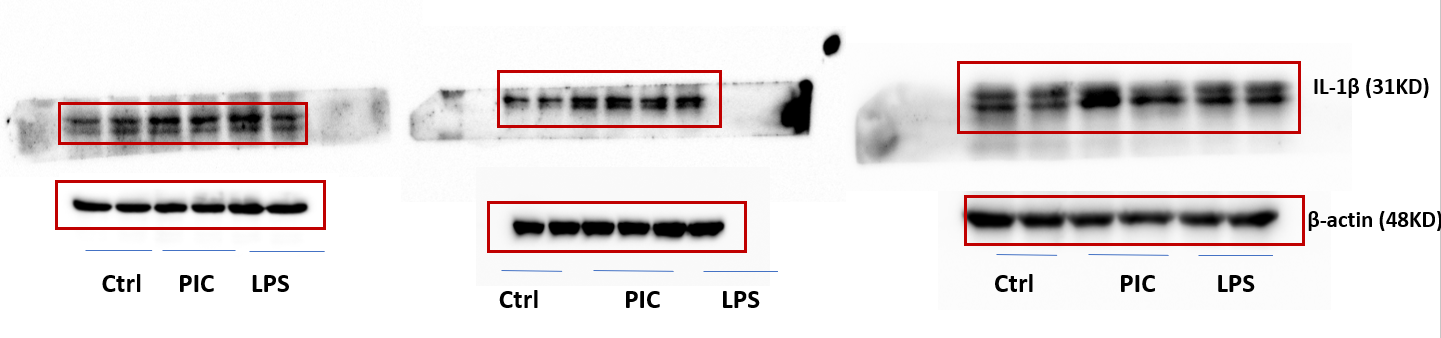


**Figure 2a**

**Figure 2a**


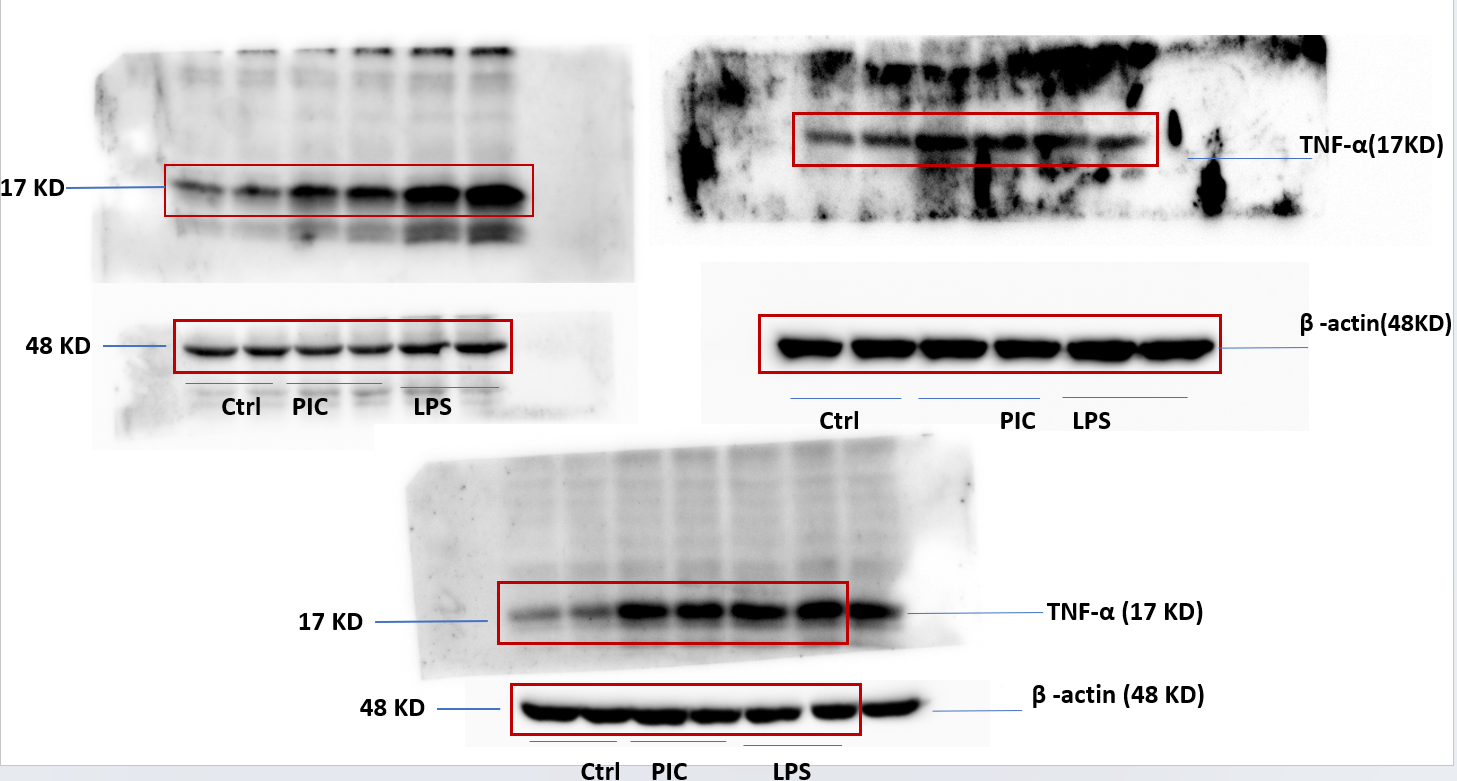


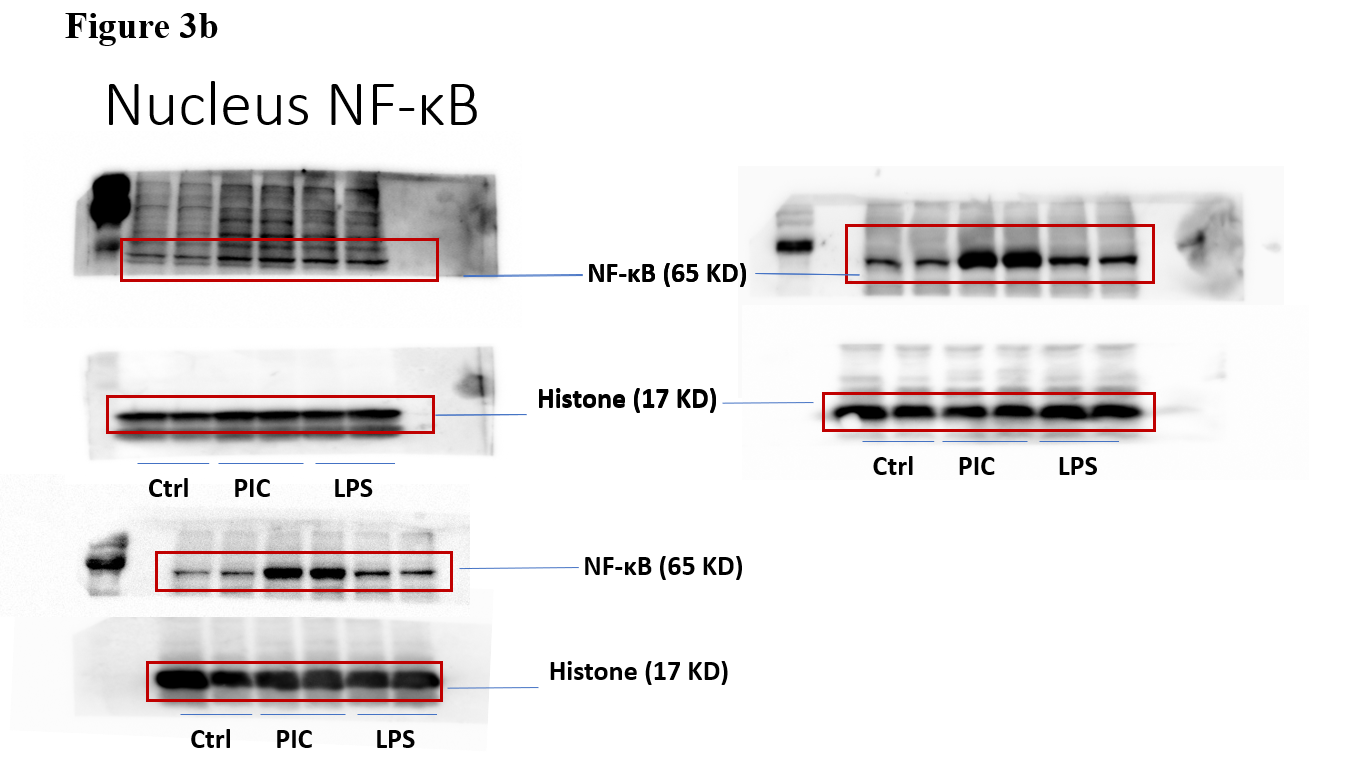

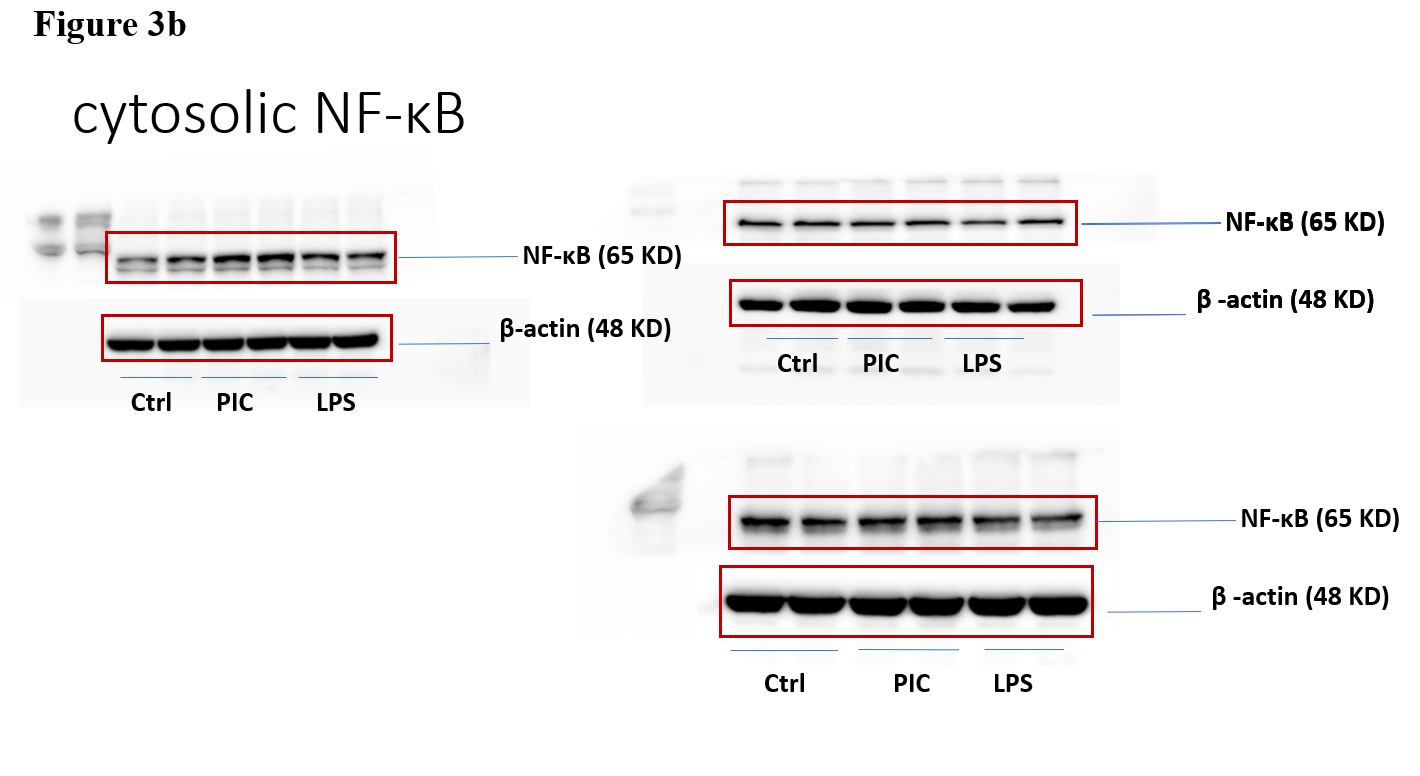


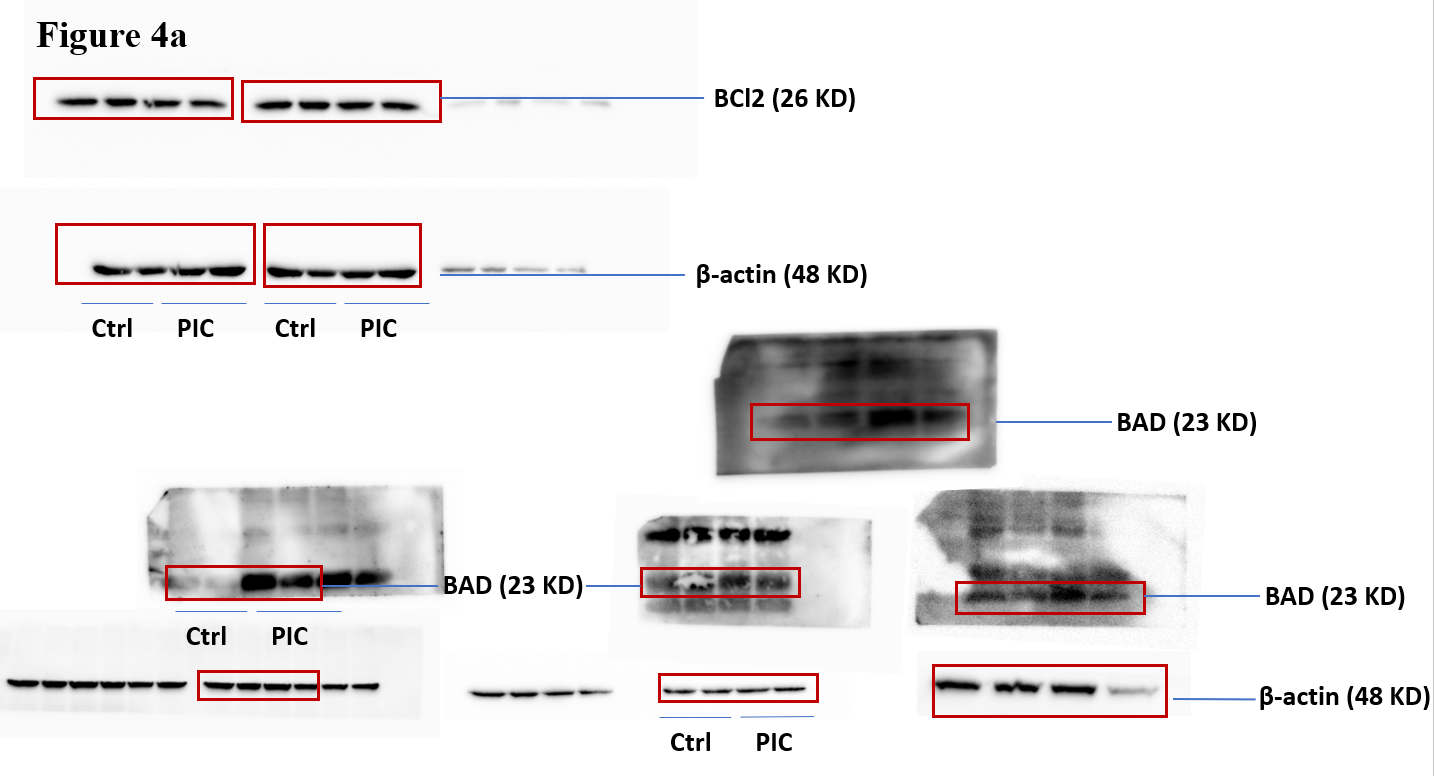

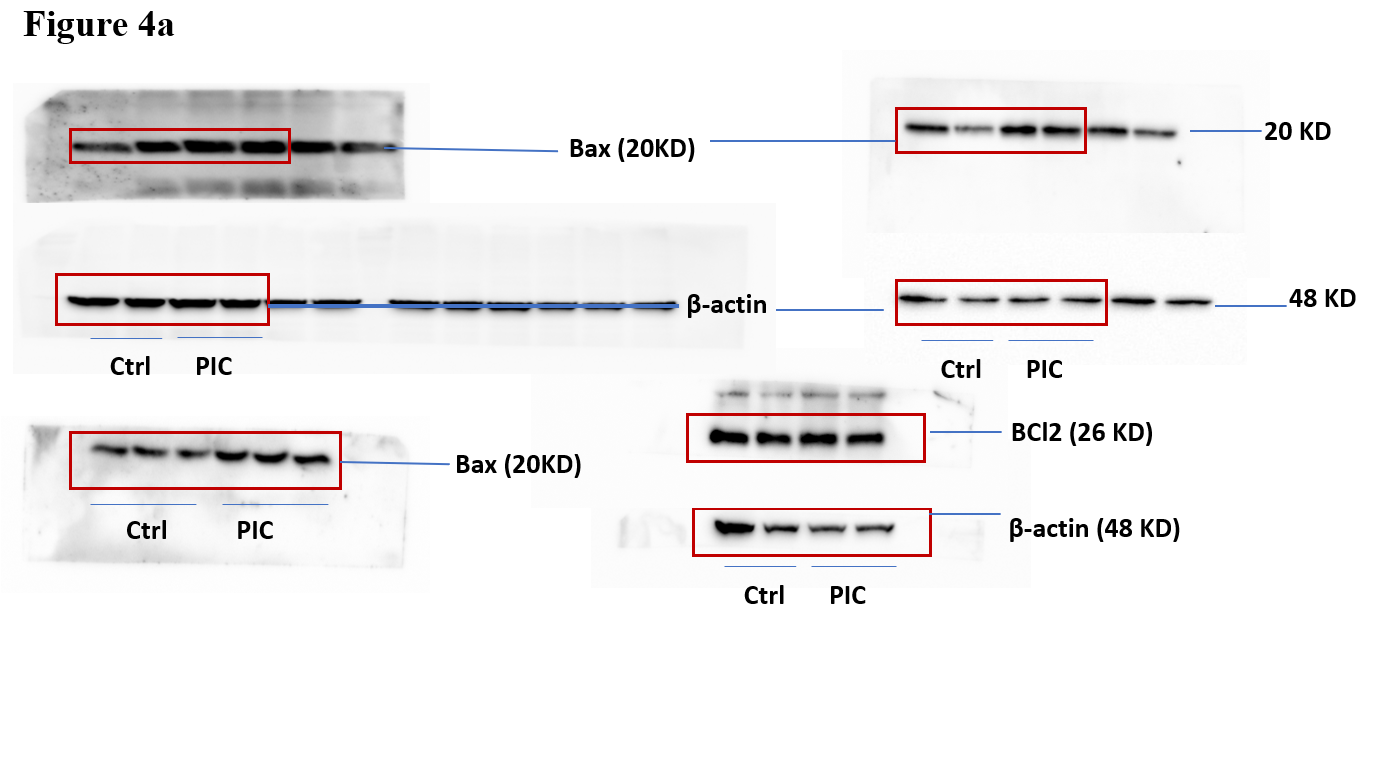


**Figure 4a**


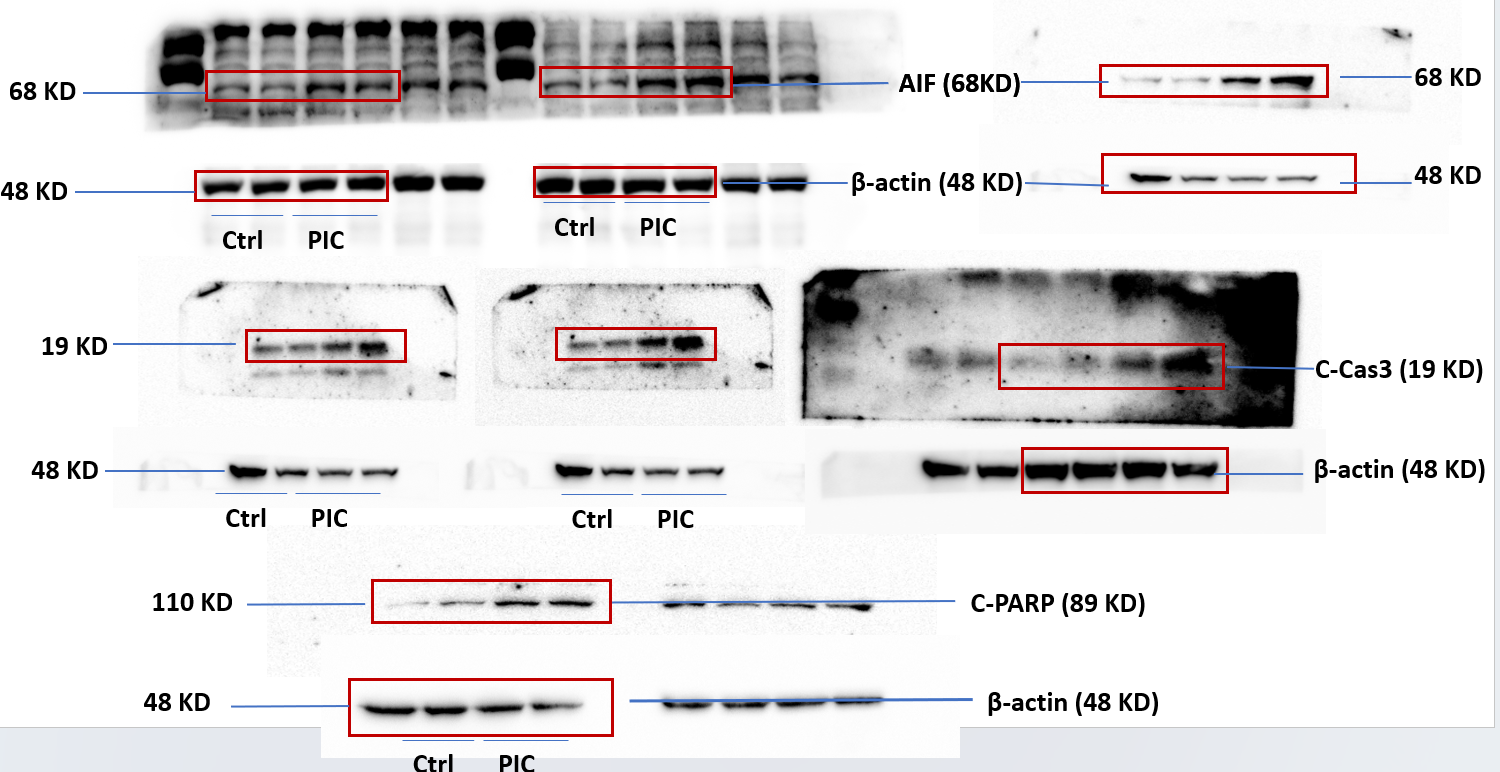


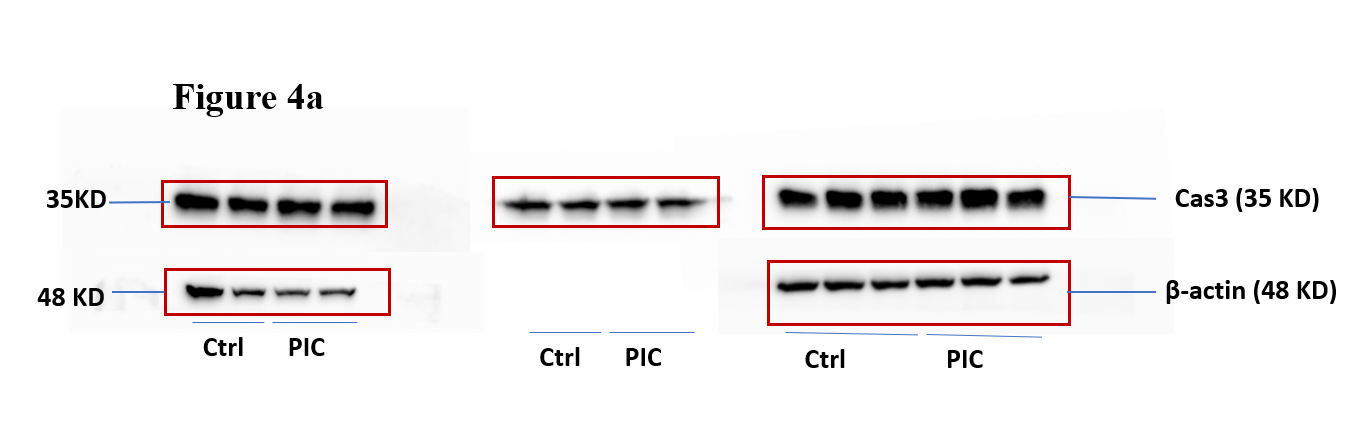

Supplement: Supplementary file 1 [file 7fa7ecf0c30f1183a3aad017.docx]
